# Supplementary material for: Muscle pathology of antisynthetase syndrome according to antibody subtypes
Source: PubMed Central journal article supplement (PMC10307527; doi:10.1111/bpa.13155), 2023-03-07
Supplement: BPA-33-e13155-s001.pdf [file BPA-33-e13155-s001.pdf]

**Supplementary eTable 1****Immunohistochemical stains used in this study**

| <b>Immunohistochemical stain</b>                         | <b>Abbreviation used</b> | <b>Clone</b>      | <b>Company</b>           |
|----------------------------------------------------------|--------------------------|-------------------|--------------------------|
| HLA-ABC                                                  | HLA-ABC                  | W6/32             | Thermo Fisher Scientific |
| HLA-DR                                                   | HLA-DR                   | B308              | Affinity Bioreagents     |
| Membrane attack complex                                  | C5b-9                    | aE11              | Dako                     |
| Myxovirus resistance protein A                           | MxA                      | Mx 1/2/3          | Santa Cruz Biotechnology |
| Neonatal myosin heavy chain                              | MHCn                     | WB-MHCn           | Leica                    |
| Utrophin                                                 | Utrophin                 | DRP3/20C5         | Novocastra               |
| CD3                                                      | CD3                      | Polyclonal        | Abcam                    |
| CD8                                                      | CD8                      | DK25              | Dako                     |
| CD20                                                     | CD20                     | L26               | eBioscience              |
| CD68                                                     | CD68                     | KPI               | Dako                     |
| p62                                                      | p62                      | SQSTM1            | Santa Cruz Biotechnology |
| Dysferlin                                                | Dysferlin                | Haml/7B6          | Leica                    |
| $\alpha$ -sarcoglycan                                    | $\alpha$ -sarcoglycan    | Adl/20A6          | Leica                    |
| $\beta$ -sarcoglycan                                     | $\beta$ -sarcoglycan     | $\beta$ -sarc/5B1 | Leica                    |
| $\gamma$ -sarcoglycan                                    | $\gamma$ -sarcoglycan    | 35DAG/21B5        | Leica                    |
| Class II major histocompatibility complex transactivator | CIITA                    | 7-1H              | Santa Cruz Biotechnology |

**Abbreviations:** HLA, human leukocyte antigen; CD, cluster of differentiation

**Supplementary eTable 2**

**Pathology domains and scoring/evaluation criteria used for muscle biopsy assessment**

| <b>Pathology domain</b>                               | <b>Scoring/evaluation criteria</b>                                                                                                                                                                                                                                   |
|-------------------------------------------------------|----------------------------------------------------------------------------------------------------------------------------------------------------------------------------------------------------------------------------------------------------------------------|
| <b>Muscle fiber domain</b>                            | Maximum score = 8                                                                                                                                                                                                                                                    |
| Necrotic fiber                                        | 0 = absence, 1 = isolated/sporadic 1–3 per 20x, 2 = scattered $\geq 4$ or more in adjacent fibers, or clustered, or $>3$ per 20x                                                                                                                                     |
| Regenerating fiber                                    | 0 = $<6$ per 20x, 1 = $\geq 6$ per 20x                                                                                                                                                                                                                               |
| Atrophic fibers away from perifascicular area         | 0 = absence, 1 = isolated/sporadic 1–3 per 20x, 2 = scattered $\geq 4$ or more in adjacent fibers, or clustered, or $>3$ per 20x                                                                                                                                     |
| Perifascicular atrophy                                | 0 = absence, 1 = affecting 1-2 fascicle(s), 2 = affecting $\geq 2$ fascicles                                                                                                                                                                                         |
| Fiber with internalized nuclei $>3\%$                 | 0 = $\leq 3\%$ , 1 = $>3\%$                                                                                                                                                                                                                                          |
| <b>Inflammatory domain</b>                            | Maximum score = 13                                                                                                                                                                                                                                                   |
| Endomysial and perimysial CD3+ cell infiltration      | 0 = none or $<4$ cells in 20x field, 1 = 4–20 cells in a 20x field or a cluster of $\geq 10$ cells, 2 = $\geq 2$ clusters in whole biopsy and/or diffusely infiltrating i.e. $>20$ cells in a 20x field (separate scores for endomysial and perimysial infiltration) |
| Endomysial and perimysial CD20+ cell infiltration     |                                                                                                                                                                                                                                                                      |
| Endomysial and perimysial CD68+ cell infiltration     |                                                                                                                                                                                                                                                                      |
| Perivascular inflammatory cell infiltration           | 0 = absence, 1 = presence                                                                                                                                                                                                                                            |
| <b>Vascular domain</b>                                |                                                                                                                                                                                                                                                                      |
| Capillary: fiber ratio                                | Utrophin-positive capillaries per the number of muscle fibers in 10 randomly photographed areas at 20x or at least 5 areas at 20x in the case of small biopsy                                                                                                        |
| <b>Connective tissue domain</b>                       |                                                                                                                                                                                                                                                                      |
| Perimysial connective tissue fragmentation            | N = absence, Y = presence                                                                                                                                                                                                                                            |
| Increased alkaline phosphatase activity in perimysium | N = absence, Y = presence                                                                                                                                                                                                                                            |
| Endomysial fibrosis                                   | N = absence, Y = presence                                                                                                                                                                                                                                            |

**Abbreviations:** N = no; Y = yes

Supplementary eTable 3

Pathology domains in antisynthetase syndrome

|                                 | Anti-ARS antibody          |                      |                      |                      |                       |                |               |                           |
|---------------------------------|----------------------------|----------------------|----------------------|----------------------|-----------------------|----------------|---------------|---------------------------|
|                                 | All ARS<br>(n = 212)       | Jo-1<br>(n = 65)     | OJ<br>(n = 20)       | PL-7<br>(n = 20)     | PL-12<br>(n = 11)     | EJ<br>(n = 10) | KS<br>(n = 1) | ARS_NOS<br>(n = 85)       |
| <b>Muscle fiber domain</b>      |                            |                      |                      |                      |                       |                |               |                           |
| Score                           | 3.0±1.8                    | 2.5±1.4*             | 4.6±2.0*             | 3.1±2.1              | 2.5±1.9               | 4.7±2.1*       | 4.0           | 2.8±1.7                   |
| <b>Inflammatory domain</b>      |                            |                      |                      |                      |                       |                |               |                           |
| Score                           | 4.9±3.0 <sup>a</sup>       | 4.9±3.2 <sup>b</sup> | 6.8±3.2*             | 4.2±1.9              | 2.6±1.5 <sup>c*</sup> | 4.5±3.0        | 2.0           | 5.0±3.0 <sup>b</sup>      |
| <b>Vascular domain</b>          |                            |                      |                      |                      |                       |                |               |                           |
| Capillary:<br>myofiber ratio    | 0.8±0.4 <sup>d</sup>       | 0.9±0.5 <sup>c</sup> | 0.8±0.2 <sup>b</sup> | 0.9±0.5 <sup>b</sup> | 0.8±0.3               | 0.6±0.3*       | 0.8           | 0.8±0.4 <sup>e</sup>      |
| <b>Connective tissue domain</b> |                            |                      |                      |                      |                       |                |               |                           |
| PM-Fr                           | 109<br>(51.9) <sup>c</sup> | 29<br>(44.6)         | 14<br>(70.0)         | 11<br>(55.0)         | 5<br>(45.5)           | 7<br>(60.0)    | 0             | 44<br>(53.0) <sup>c</sup> |
| PM-ALP                          | 102<br>(48.1)              | 22<br>(33.8)*        | 14<br>(70.0)*        | 10<br>(50.0)         | 3<br>(27.3)           | 9<br>(90.0)*   | 1             | 43<br>(50.6)              |
| Endomysial<br>fibrosis          | 34<br>(16.2) <sup>c</sup>  | 5<br>(7.7)*          | 4<br>(20.0)          | 2<br>(10.0)          | 3<br>(27.3)           | 6<br>(60.0)*   | 0             | 14<br>(16.9) <sup>c</sup> |

Continuous data is shown as mean and ± standard deviation while categorical data is reported as number and (percentage).

**Abbreviations:** ARS, anti-tRNA synthetase; NOS, not otherwise specified; PM-Fr, perimysial fragmentation; PM-ALP, increased perimysial alkaline phosphatase activity.

<sup>a</sup>Four cases were excluded from the analysis due to artifacts

<sup>b</sup>One case was excluded from the analysis due to artifacts

<sup>c</sup>Two cases were excluded from the analysis due to artifacts

<sup>d</sup>Seven cases were excluded from the analysis due to artifacts

<sup>e</sup>Three cases were excluded from the analysis due to artifacts

\*p < 0.05 compared to the other antibody subtypes

**Supplementary eTable 4**

**Muscle fiber domain scores in antisynthetase syndrome**

|                                      | <b>Anti-ARS antibody</b>    |                         |                       |                        |                          |                       |                      |                            |
|--------------------------------------|-----------------------------|-------------------------|-----------------------|------------------------|--------------------------|-----------------------|----------------------|----------------------------|
|                                      | <b>All ARS</b><br>(n = 212) | <b>Jo-1</b><br>(n = 65) | <b>OJ</b><br>(n = 20) | <b>PL-7</b><br>(n =20) | <b>PL-12</b><br>(n = 11) | <b>EJ</b><br>(n = 10) | <b>KS</b><br>(n = 1) | <b>ARS_NOS</b><br>(n = 85) |
| <b>Muscle fiber domain</b>           |                             |                         |                       |                        |                          |                       |                      |                            |
| Total Score                          | 3.0±1.8                     | 2.5±1.4*                | 4.6±2.0*              | 3.1±2.1                | 2.5±1.9                  | 4.7±2.1*              | 4.0                  | 2.8±1.7                    |
| Necrotic fiber score                 | 1.1±0.8                     | 0.9±0.7*                | 1.7±0.6*              | 1.3±0.6                | 0.7±0.8                  | 1.3±0.8               | 2.0                  | 2.5±1.4                    |
| Regenerating fiber score             | 0.6±0.5                     | 0.6±0.5                 | 0.9±0.4*              | 0.6±0.5                | 0.4±0.5                  | 0.8±0.4               | 1.0                  | 0.6±0.5                    |
| Atrophic fiber score                 | 0.7±0.8                     | 0.6±0.7*                | 1.0±0.9               | 0.7±0.9                | 0.8±0.9                  | 1.2±0.8               | 0                    | 0.7±0.8                    |
| PFA score                            | 0.2±0.6                     | 0.1±0.4*                | 0.7±0.9*              | 0.3±0.7                | 0.3±0.6                  | 0.8±0.8               | 1.0                  | 0.2±0.5                    |
| Fiber with internalized nuclei score | 0.3±0.5                     | 0.3±0.5                 | 0.3±0.5               | 0.2±0.4                | 0.3±0.5                  | 0.6±0.5               | 0                    | 0.2±0.4                    |
| Fiber with internalized nuclei >3%   | 60 (28.3)                   | 22 (33.8)               | 6 (30.0)              | 4 (21.1)               | 3 (27.3)                 | 6 (54.5)              | 0                    | 19 (22.4)                  |

Continuous data is shown as mean and ± standard deviation while categorical data is reported as number and (percentage).

**Abbreviations:** ARS, anti-tRNA synthetase; NOS, not otherwise specified; PFA, perifascicular atrophy

\*p < 0.05 compared to the other antibody subtypes

**Supplementary eTable 5**

**Inflammatory domain in antisynthetase syndrome**

|                                                   | <b>Anti-ARS antibody</b>    |                         |                       |                         |                          |                       |                      |                            |
|---------------------------------------------------|-----------------------------|-------------------------|-----------------------|-------------------------|--------------------------|-----------------------|----------------------|----------------------------|
|                                                   | <b>All ARS</b><br>(n = 212) | <b>Jo-1</b><br>(n = 65) | <b>OJ</b><br>(n = 20) | <b>PL-7</b><br>(n = 20) | <b>PL-12</b><br>(n = 11) | <b>EJ</b><br>(n = 10) | <b>KS</b><br>(n = 1) | <b>ARS_NOS</b><br>(n = 85) |
| <b>Inflammatory domain</b>                        |                             |                         |                       |                         |                          |                       |                      |                            |
| Total Score                                       | 4.9±3.0 <sup>a</sup>        | 4.9±3.2 <sup>b</sup>    | 6.8±3.2*              | 4.2±1.9                 | 2.6±1.5 <sup>c*</sup>    | 4.5±3.0               | 2.0                  | 5.0±3.0 <sup>b</sup>       |
| Endomysial CD3 infiltration                       | 0.7±0.8 <sup>a</sup>        | 0.8±0.8 <sup>b</sup>    | 1.1±0.9               | 0.8±0.5                 | 0.1±0.3 <sup>c*</sup>    | 0.7±0.8               | 0                    | 0.7±0.7 <sup>b</sup>       |
| Perimysial CD3 infiltration                       | 0.3±0.6 <sup>a</sup>        | 0.3±0.7 <sup>b</sup>    | 0.6±0.7               | 0*                      | 0 <sup>c*</sup>          | 0.2±0.4               | 0                    | 0.3±0.6 <sup>b</sup>       |
| Endomysial CD20 infiltration                      | 0.4±0.7 <sup>a</sup>        | 0.5±0.7 <sup>b</sup>    | 0.7±0.7               | 0.4±0.6                 | 0.1±0.3 <sup>c*</sup>    | 0.2±0.4               | 0                    | 0.4±0.7 <sup>b</sup>       |
| Perimysial CD20 infiltration                      | 0.2±0.5 <sup>a</sup>        | 0.2±0.5 <sup>b</sup>    | 0.3±0.6               | 0.2±0.4                 | 0 <sup>c*</sup>          | 0.1±0.3               | 0                    | 0.3±0.6 <sup>b</sup>       |
| Endomysial CD68 infiltration                      | 1.6±0.5 <sup>a</sup>        | 1.6±0.6 <sup>b</sup>    | 1.9±0.4*              | 1.7±0.5                 | 1.3±0.7 <sup>c</sup>     | 1.7±0.7               | 0                    | 1.6±0.5 <sup>b</sup>       |
| Perimysial CD68 infiltration                      | 1.1±0.8 <sup>a</sup>        | 1.0±0.8 <sup>b</sup>    | 1.6±0.7*              | 0.8±0.8                 | 0.8±0.7 <sup>c</sup>     | 1.2±0.9               | 0                    | 1.3±0.7 <sup>b</sup>       |
| Perivascular inflammatory cell infiltration score | 0.4±0.5                     | 0.4±0.5                 | 0.8±0.4*              | 0.4±0.5                 | 0.2±0.4                  | 0.4±0.5               | 0                    | 0.4±0.5                    |
| Perivascular inflammatory cell infiltration       | 87 (41.0)                   | 26 (40.0)               | 15 (75.0)*            | 7 (35.0)                | 2 (18.2)                 | 4 (40.0)              | 0                    | 33 (38.8)                  |

Categorical data is reported as number and (percentage).

**Abbreviations:** ARS, anti-tRNA synthetase; NOS not otherwise specified; CD, cluster of differentiation

<sup>a</sup>Four cases were excluded from the analysis due to artifacts

<sup>b</sup>One case was excluded from the analysis due to artifacts

<sup>c</sup>Two cases were excluded from the analysis due to artifacts

\*p < 0.05 compared to the other antibody subtypes

Supplementary eTable 6

Myopathology patterns and histological features of interest in antisynthetase syndrome

|                                             | Anti-ARS antibody    |                         |                      |                  |                       |                |               | ARS_NOS<br>(n = 85)  |
|---------------------------------------------|----------------------|-------------------------|----------------------|------------------|-----------------------|----------------|---------------|----------------------|
|                                             | All ARS<br>(n = 212) | Jo-1<br>(n = 65)        | OJ<br>(n = 20)       | PL-7<br>(n = 20) | PL-12<br>(n = 11)     | EJ<br>(n = 10) | KS<br>(n = 1) |                      |
| <b>Myopathology patterns<sup>a</sup></b>    |                      |                         |                      |                  |                       |                |               |                      |
| Normal/non-specific                         | 37 (17.6)            | 13 (20.0)               | 0*                   | 2 (10.0)         | 3 (27.3)              | 2 (20.0)       | 0             | 17 (20.5)            |
| Necrotizing myopathy without PFN            | 97 (46.2)            | 25 (38.5)               | 10 (50.0)            | 7 (35.0)         | 6 (54.5)              | 5 (50.0)       | 0             | 44 (53.0)            |
| Necrotizing myopathy with PFN               | 59 (28.1)            | 19 (29.2)               | 9 (45.0)             | 11 (55.0)*       | 0*                    | 3 (30.0)       | 1 (100.0)     | 16 (19.3)            |
| Others                                      | 17 (8.1)             | 8 (12.3) <sup>b,c</sup> | 1 (5.0) <sup>d</sup> | 0                | 2 (18.2) <sup>e</sup> | 0              | 0             | 6 (7.2) <sup>f</sup> |
| <b>Histological features of interest</b>    |                      |                         |                      |                  |                       |                |               |                      |
| PFN                                         | 60 (28.3)            | 20 (30.8)               | 9 (45.0)             | 11 (55.0)*       | 0*                    | 3 (30.0)       | 1 (100.0)     | 16 (18.8)            |
| PFA                                         | 36 (17.0)            | 6 (9.2)*                | 8 (40.0)*            | 3 (15.0)         | 2 (18.2)              | 6 (60.0)*      | 1 (100.0)     | 10 (11.8)            |
| PF-COX, decreased                           | 9 (4.2)              | 2 (3.1)                 | 2 (10.0)             | 1 (5.0)          | 0                     | 1 (10.0)       | 0             | 3 (3.5)              |
| Vasculitis <sup>g</sup>                     | 36 (17.0)            | 8 (12.3)                | 9 (45.0)*            | 3 (15.0)         | 0                     | 1 (10.0)       | 0             | 15 (17.6)            |
| CD8 infiltration in non-necrotic fiber      | 1 (0.5)              | 0                       | 0                    | 0                | 0                     | 0              | 0             | 1 (1.2)              |
| CD68/ACP infiltration in non-necrotic fiber | 7 (3.3)              | 2 (3.1)                 | 1 (5.0)              | 1 (5.3)          | 0                     | 1 (9.1)        | 0             | 2 (2.4)              |
| CD20 aggregation                            | 10 (4.7)             | 4 (6.2)                 | 1 (5.0)              | 1 (5.3)          | 0                     | 0              | 0             | 4 (4.7)              |

Categorical data is reported as number and (percentage). \* $p < 0.05$  compared to the other antibody subtypes

**Abbreviations:** ARS, anti-tRNA synthetase; ACP, acid phosphatase; CD, cluster of differentiation; COX, cytochrome C oxidase; PF, perifascicular; PFA, perifascicular atrophy; PFN, perifascicular necrosis; NOS, not otherwise specified

<sup>a</sup> Two cases of ARS, nos were excluded from the analysis due to artifacts

<sup>b</sup> One case classified as granulomatous myositis showed concurrent PFN and granulomatous inflammation

<sup>c</sup> Type 2 fiber atrophy (1), Neurogenic change (4), rimmed vacuole (1), nemaline bodies (1)

<sup>d</sup> Type 2 fiber strophy (1)

<sup>e</sup> Type 2 fiber strophy (1), rimmed vacuole (1)

<sup>f</sup> Neurogenic change (2), rimmed vacuole (2), nemaline bodies (1), cytoplasmic body (1)

<sup>g</sup> Vasculitis: presence of inflammatory cells infiltration in the vascular wall

Supplementary eTable 7

Immunohistochemical feature in antisynthetase syndrome

|                                         | Anti-ARS antibody          |                  |                |                  |                   |                |               |                           |
|-----------------------------------------|----------------------------|------------------|----------------|------------------|-------------------|----------------|---------------|---------------------------|
|                                         | All ARS<br>(n = 212)       | Jo-1<br>(n = 65) | OJ<br>(n = 20) | PL-7<br>(n = 20) | PL-12<br>(n = 11) | EJ<br>(n = 10) | KS<br>(n = 1) | ARS_NOS<br>(n = 85)       |
| HLA-ABC expression                      | 196<br>(92.5)              | 6<br>1 (93.8)    | 20<br>(100.0)  | 20<br>(100.0)    | 9<br>(81.8)       | 10<br>(100.0)  | 1<br>(100.0)  | 75<br>(88.2)              |
| HLA-ABC expression with PF enhancement  | 36<br>(17.0)               | 17<br>(26.2)*    | 1<br>(5.0)     | 0                | 0                 | 1<br>(10.0)    | 0             | 17<br>(20.0)              |
| HLA-DR expression                       | 128<br>(60.4)              | 44<br>(67.7)     | 13<br>(65.0)   | 10<br>(50.0)     | 5<br>(45.5)       | 5<br>(50.0)    | 1<br>(100.0)  | 50<br>(58.8)              |
| C5b-9 capillary deposition              | 124<br>(58.8) <sup>a</sup> | 42<br>(64.6)     | 10<br>(50.0)   | 13<br>(65.0)     | 6<br>(54.5)       | 4<br>(40.0)    | 0             | 49<br>(58.3) <sup>a</sup> |
| C5b-9 capillary deposition in PF area   | 13 (6.2) <sup>a</sup>      | 6 (9.2)          | 1 (5.0)        | 0                | 2 (18.2)          | 0              | 0             | 4 (4.8)                   |
| C5b-9 sarcolemmal deposition            | 100<br>(47.2)              | 27<br>(41.5)     | 10<br>(50.0)   | 8<br>(40.0)      | 2<br>(18.2)       | 8<br>(80.0)*   | 0             | 45<br>(52.9)              |
| C5b-9 sarcolemmal deposition in PF area | 64<br>(30.2)               | 19<br>(29.2)     | 7<br>(35.0)    | 4<br>(20.0)      | 1<br>(9.1)        | 6<br>(60.0)    | 0             | 27<br>(31.8)              |
| MxA expression                          | 3 (1.4)                    | 1 (1.5)          | 1 (5.0)        | 1 (5.0)          | 0                 | 0              | 0             | 0                         |

Categorical data is reported as number and (percentage).

**Abbreviations:** ARS, anti-tRNA synthetase; HLA, human leukocyte antigen; NOS, not otherwise specified; C5b-9, membrane attack complex; MxA, Myxovirus resistance protein A; PF, perifascicular

<sup>a</sup>One case was not included due to artifacts

\* $p < 0.05$  compared to the other antibody subtypes

Supplementary eTable 8

HLA-DR expression patterns in ASS

|                                | Anti-ARS antibody    |                  |                |                  |                   |                |               |                     |
|--------------------------------|----------------------|------------------|----------------|------------------|-------------------|----------------|---------------|---------------------|
|                                | All ARS<br>(n = 212) | Jo-1<br>(n = 65) | OJ<br>(n = 20) | PL-7<br>(n = 20) | PL-12<br>(n = 11) | EJ<br>(n = 10) | KS<br>(n = 1) | ARS_NOS<br>(n = 85) |
| HLA-DR expression              | 128 (60.4)           | 44 (67.7)        | 13 (65.0)      | 10 (50.0)        | 5 (45.5)          | 5 (50.0)       | 1 (100.0)     | 50 (58.8)           |
| Pattern 1                      | 19 (9.0)             | 1 (1.5)*         | 2 (10.0)       | 1 (5.0)          | 3 (27.3)*         | 2 (20.0)       | 0             | 10 (11.8)           |
| Pattern 1+                     | 3 (1.4)              | 1 (1.5)          | 1 (5.0)        | 0                | 0                 | 0              | 0             | 1 (1.2)             |
| Pattern 2                      | 13 (6.1)             | 1 (1.5)*         | 3 (15.0)       | 2 (10.0)         | 0                 | 0              | 0             | 7 (8.2)             |
| Pattern 3                      | 14 (6.6)             | 2 (3.1)          | 1 (5.0)        | 4 (20.0)*        | 0                 | 0              | 1 (100.0)     | 6 (7.1)             |
| Pattern 4                      | 60 (28.3)            | 30 (46.2)*       | 4 (20.0)       | 3 (15.0)         | 2 (18.2)          | 2 (10.0)       | 0             | 19 (22.4)           |
| Pattern 5                      | 19 (9.0)             | 9 (13.8)         | 2 (10.0)       | 0                | 0                 | 1 (10.0)       | 0             | 7 (8.2)             |
| Perifascicular pattern (3+4+5) | 93 (43.9)            | 41 (63.1)*       | 7 (35.0)       | 7 (35.0)         | 2 (18.2)          | 3 (30.0)       | 1 (100.0)     | 32 (37.6)           |

Categorical data is reported as number and (percentage).

**Note:** Pattern 1 and 1+ HLA-DR expression show non-specific localization. We did not include pattern 2 in “perifascicular pattern” because small number HLA-DR-positive myofibers were present in perifascicular areas; we suspected that such findings could be randomly present and non-specific.

**Abbreviations:** ARS, anti-tRNA synthetase; HLA, human leukocyte antigen; NOS, not otherwise specified

\*p < 0.05 compared to the other antibody subtypes



Supplementary eTable 9

## Myopathology patterns and HLA-DR expression pattern 3, 4, and 5

|                                  | Anti-ARS antibody                 |                      |                |                  |                   |                |               |                                  |
|----------------------------------|-----------------------------------|----------------------|----------------|------------------|-------------------|----------------|---------------|----------------------------------|
|                                  | All ARS<br>(n = 210) <sup>a</sup> | Jo-1<br>(n = 65)     | OJ<br>(n = 20) | PL-7<br>(n = 20) | PL-12<br>(n = 11) | EJ<br>(n = 10) | KS<br>(n = 1) | ARS_NOS<br>(n = 83) <sup>a</sup> |
| <b>HLA-DR expression</b>         |                                   |                      |                |                  |                   |                |               |                                  |
| Normal/non-specific              | 10 (4.8)                          | 4 (6.2)              | 0              | 0                | 0                 | 1 (10.0)       | 0             | 5 (6.0)                          |
| Necrotizing myopathy without PFN | 63 (30.0)                         | 18 (27.7)            | 7 (35.0)       | 5 (25.0)         | 3 (27.3)          | 1 (10.0)       | 0             | 29 (34.9)                        |
| Necrotizing myopathy with PFN    | 49 (23.3)                         | 19 (29.2)            | 6 (30.0)       | 5 (25.0)         | 0                 | 3 (30.0)       | 1 (100)       | 15 (18.1)                        |
| Others                           | 5 (2.4)                           | 3 (4.6)              | 0              | 0                | 2 (18.2)          | 0              | 0             | 0                                |
| <b>Pattern 3</b>                 |                                   |                      |                |                  |                   |                |               |                                  |
| Normal/non-specific              | 3 (1.4)                           | 1 (1.5)              | 0              | 0                | 0                 | 0              | 0             | 1 (1.2)                          |
| Necrotizing myopathy without PFN | 5 (2.4)                           | 1 (1.5)              | 0              | 3 (15.0)         | 0                 | 0              | 0             | 1 (1.2)                          |
| Necrotizing myopathy with PFN    | 6 (2.9)                           | 0                    | 1 (5.0)        | 1 (5.0)          | 0                 | 0              | 1 (100)       | 3 (3.6)                          |
| Others                           | 0                                 | 0                    | 0              | 0                | 0                 | 0              | 0             | 0                                |
| <b>Pattern 4</b>                 |                                   |                      |                |                  |                   |                |               |                                  |
| Normal/non-specific              | 6 (2.9)                           | 3 (4.6)              | 0              | 0                | 0                 | 0              | 0             | 3 (3.6)                          |
| Necrotizing myopathy without PFN | 29 (13.8)                         | 14 (21.5)            | 2 (10.0)       | 1 (5.3)          | 2 (18.2)          | 0              | 0             | 10 (12.0)                        |
| Necrotizing myopathy with PFN    | 24 (11.4)                         | 12 (18.5)            | 2 (10.0)       | 2 (10.5)         | 0                 | 2 (18.2)       | 0             | 6 (7.2)                          |
| Others                           | 1 (0.5)                           | 1 (1.5) <sup>b</sup> | 0              | 0                | 0                 | 0              | 0             | 0                                |
| <b>Pattern 5</b>                 |                                   |                      |                |                  |                   |                |               |                                  |
| Normal/non-specific              | 1 (0.5)                           | 0                    | 0              | 0                | 0                 | 1 (9.1)        | 0             | 0                                |
| Necrotizing myopathy without PFN | 7 (3.3)                           | 2 (3.1)              | 1 (5.0)        | 0                | 0                 | 0              | 0             | 4 (4.8)                          |
| Necrotizing myopathy with PFN    | 11 (5.2)                          | 7 (10.8)             | 1 (5.0)        | 0                | 0                 | 0              | 0             | 3 (3.6)                          |
| Others                           | 0                                 | 0                    | 0              | 0                | 0                 | 0              | 0             | 0                                |

Categorical data is reported as number and (percentage). \* $p < 0.05$  compared to the other antibody subtypes

**Abbreviations:** ARS, anti-tRNA synthetase; NOS, not otherwise specified; PFN, perifascicular necrosis

<sup>a</sup>Two cases of ARS\_NOS were excluded from the analysis due to artifacts

<sup>b</sup>Neurogenic muscle biopsy

Supplementary eTable 10

HLA-DR expression patterns in non-ASS AIM and P-MM

|                                | Non-ASS AIM (n = 602) |                   |                  |                  |                 | P-MM (n = 140)   |                 |                 |                  |
|--------------------------------|-----------------------|-------------------|------------------|------------------|-----------------|------------------|-----------------|-----------------|------------------|
|                                | DM<br>(n = 188)       | IMNM<br>(n = 313) | IBM<br>(n = 101) | DYSF<br>(n = 50) | SGP<br>(n = 15) | LMNA<br>(n = 16) | ANO5<br>(n = 3) | FKRP<br>(n = 9) | FSHD<br>(n = 47) |
| HLA-DR expression              | 28 (14.9)*            | 20 (6.4)*         | 99 (98.0)*       | 0                | 0               | 0                | 0               | 0               | 1 (2.1)*         |
| Pattern 1                      | 3 (1.6)               | 11 (3.5)          | 30 (29.7)        | 0                | 0               | 0                | 0               | 0               | 1 (2.1)          |
| Pattern 1+                     | 0                     | 0                 | 65 (64.4)        | 0                | 0               | 0                | 0               | 0               | 0                |
| Pattern 2                      | 4 (2.1)               | 3 (1.0)           | 1 (1.0)          | 0                | 0               | 0                | 0               | 0               | 0                |
| Pattern 3                      | 7 (3.7)               | 2 (0.6)           | 0                | 0                | 0               | 0                | 0               | 0               | 0                |
| Pattern 4                      | 10 (5.3)              | 4 (1.3)           | 0                | 0                | 0               | 0                | 0               | 0               | 0                |
| Pattern 5                      | 4 (2.1)               | 0                 | 3 (3.0)          | 0                | 0               | 0                | 0               | 0               | 0                |
| Perifascicular pattern (3+4+5) | 21 (11.2)             | 6 (1.9)           | 3 (3.0)          | 0                | 0               | 0                | 0               | 0               | 0                |

Categorical data is reported as number and (percentage).

**Note:** Pattern 1 and 1+ HLA-DR expression show non-specific localization. We did not include pattern 2 in “perifascicular pattern” because small number HLA-DR-positive myofibers were present in perifascicular areas; we suspected that such findings could be randomly present and non-specific.

**Abbreviations:** AIM, autoimmune myositis; ASS, antisynthetase syndrome; P-MM, possible myositis mimics; DM, dermatomyositis; IMNM, immune-mediated necrotizing myopathy; IBM, inclusion body myositis; DYSF, dysferlinopathy; SGP, sarcoglycanopathy; LMNA, laminopathy; ANO5, anoctamin5 myopathy; FKRP, fukutin-related protein myopathy; FSHD, facioscapulohumeral muscular dystrophy

\*p < 0.05 compared to ASS

**Supplementary eTable 11**

**Pathology domains in antisynthetase syndrome of the original cohort**

|                                 | Anti-ARS antibody    |                  |                      |                      |                  |               |               |
|---------------------------------|----------------------|------------------|----------------------|----------------------|------------------|---------------|---------------|
|                                 | All ARS<br>(n = 50)  | Jo-1<br>(n = 15) | OJ<br>(n = 13)       | PL-7<br>(n = 12)     | PL-12<br>(n = 4) | EJ<br>(n = 5) | KS<br>(n = 1) |
| <b>Muscle fiber domain</b>      |                      |                  |                      |                      |                  |               |               |
| score                           | 3.3±2.2              | 2.2±1.3*         | 5.2±2.0*             | 3.3±2.5              | 1.3±0.5*         | 3.6±2.4       | 4.0           |
| <b>Inflammatory domain</b>      |                      |                  |                      |                      |                  |               |               |
| score                           | 4.5±2.9              | 3.9±2.9          | 7.2±3.0*             | 3.9±1.8              | 2.8±1.0*         | 2.8±2.4       | 2.0           |
| <b>Vascular domain</b>          |                      |                  |                      |                      |                  |               |               |
| Capillary: muscle fiber ratio   | 0.8±0.3 <sup>a</sup> | 0.9±0.5          | 0.9±0.2 <sup>b</sup> | 0.8±0.4 <sup>b</sup> | 0.7 ±0.1         | 0.7 ±0.2      | 0.8           |
| <b>Connective tissue domain</b> |                      |                  |                      |                      |                  |               |               |
| PM-Fr                           | 27 (54.0)            | 6 (40)           | 9 (69.2)             | 7 (58.3)             | 3 (75.0)         | 2 (40.0)      | 0             |
| PM-ALP                          | 29 (58.0)            | 6 (40)           | 10 (76.9)            | 8 (66.7)             | 0*               | 4 (80.0)      | 1 (100.0)     |
| Endomysial fibrosis             | 3 (6.0)              | 0                | 1 (7.7)              | 1 (8.3)              | 0                | 1 (20.0)      | 0             |

Continuous data is shown as mean and ± standard deviation while categorical data is reported as number and (percentage).  
Abbreviations: ARS, anti-tRNA synthetase; PM-Fr, perimysial connective tissue fragmentation; PM-ALP, increased perimysial alkaline phosphatase activity

<sup>a</sup>Two cases were excluded from analysis due to artifacts

<sup>b</sup>One case was excluded from analysis due to artifacts

**Supplementary eTable 12**

**Immunohistochemical feature in antisynthetase syndrome of the original cohort**

|                                                       | Anti-ARS antibody   |                  |                |                  |                  |               |               |
|-------------------------------------------------------|---------------------|------------------|----------------|------------------|------------------|---------------|---------------|
|                                                       | All ARS<br>(n = 50) | Jo-1<br>(n = 15) | OJ<br>(n = 13) | PL-7<br>(n = 12) | PL-12<br>(n = 4) | EJ<br>(n = 5) | KS<br>(n = 1) |
| HLA-ABC expression                                    | 49<br>(98.0)        | 14<br>(93.3)     | 13<br>(100.0)  | 12<br>(100.0)    | 4<br>(100.0)     | 5<br>(100.0)  | 1<br>(100.0)  |
| HLA-ABC expression with PF enhancement                | 2 (4.0)             | 2 (13.3)         | 0              | 0                | 0                | 0             | 0             |
| HLA-DR expression                                     | 27 (54.0)           | 9 (60.0)         | 8 (61.5)       | 4 (33.3)         | 2 (50.0)         | 3 (60.0)      | 1 (100.0)     |
| HLA-DR expression with perifascicular pattern (3+4+5) | 20 (40.0)           | 8 (53.3)         | 5 (38.5)       | 2 (16.7)         | 2 (50.0)         | 2 (40.0)      | 1 (100.0)     |
| C5b-9 capillary deposition                            | 28 (56.0)           | 12 (80.0)*       | 7 (53.8)       | 5 (41.7)         | 2 (50.0)         | 2 (40.0)      | 0             |
| C5b-9 capillary deposition in PF area                 | 2 (4.0)             | 1 (6.7)*         | 1 (7.7)*       | 0*               | 0*               | 0*            | 0             |
| C5b-9 sarcolemmal deposition                          | 19 (38.0)           | 4 (26.7)         | 7 (53.8)       | 5 (41.7)         | 0                | 3 (60)        | 0             |
| C5b-9 sarcolemmal deposition in PF area               | 14 (28.0)           | 2 (13.3)         | 6 (46.2)       | 4 (33.3)         | 0                | 2 (40.0)      | 0             |
| MxA expression                                        | 1 (2.0)             | 0                | 0              | 1 (8.3)          | 0                | 0             | 0             |

Continuous data is shown as mean and ± standard deviation while categorical data is reported as number and (percentage).  
Abbreviations: ARS, anti-tRNA synthetase; HLA, human leukocyte antigen; PF, perifascicular area; C5b-9, membrane attack complex; MxA, myxovirus resistant protein A

\*p < 0.05 compared to the other antibody subtype

**Supplementary eFigure 1**

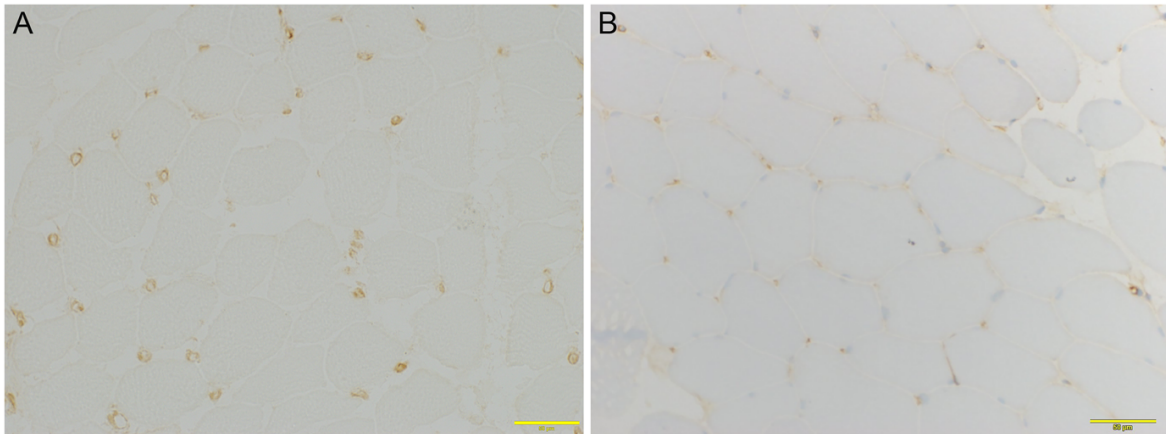

**Representative figure showing decreased capillary: myofiber ratio:** The number of utrophin-positive capillaries is focally decreased in this anti-OJ ASS (A) compared to the control (B).

**Note:** bar = 50  $\mu$ m; Utrophin

**Supplementary eFigure 2.**

**Representative figure showing HLA-ABC staining pattern**

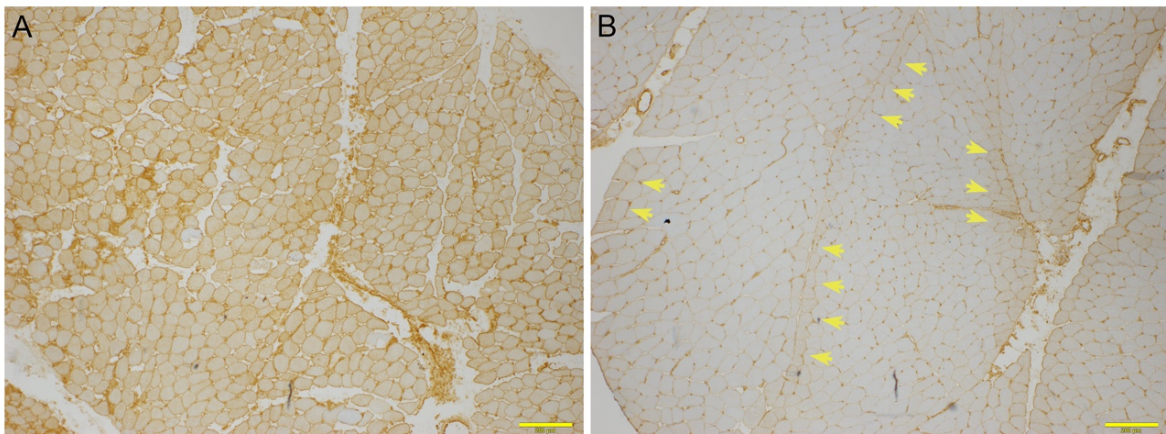

**Representative figure showing HLA-ABC staining pattern:** This anti-OJ ASS shows diffuse HLA-ABC expression pattern (A) while this anti-Jo-1 ASS shows HLA-ABC expression with perifascicular enhancement (B, arrows)

**Note:** bar = 200  $\mu$ m; HLA-ABC, human leukocyte antigen-ABC, major histocompatibility complex class I.

**Supplementary eFigure 3.**

**P-MM: FSHD with HLA-DR expression**

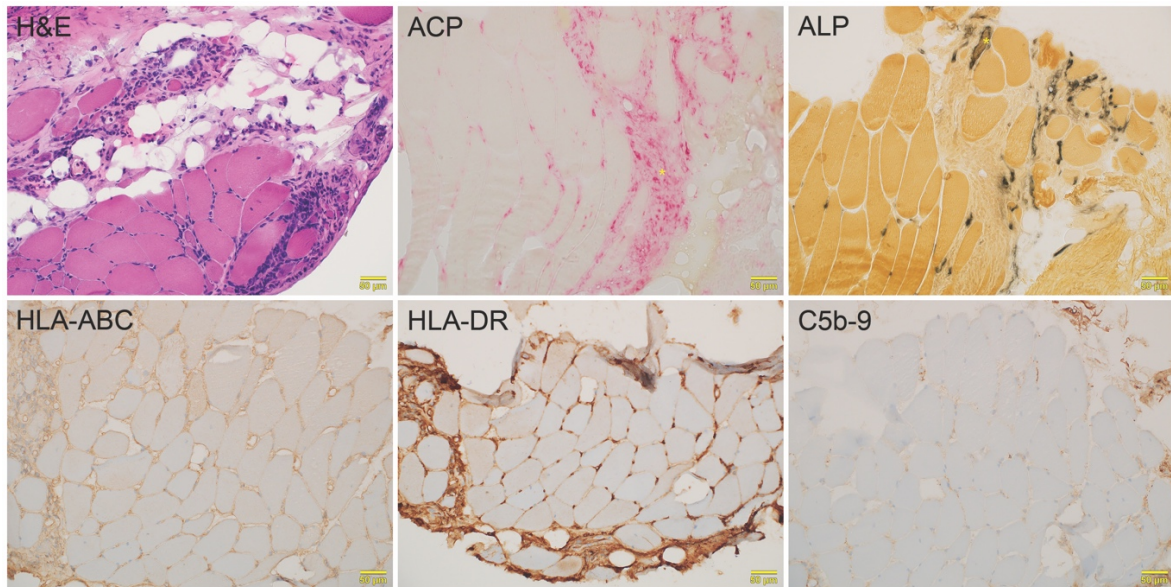

**The muscle biopsy from the HLA-DR-positive FSHD patient.** H&E shows fibrofatty infiltration with inflammatory cell infiltration. Many inflammatory cells show lysosomal activity which is highlighted by ACP stain(asterisk), suggestive of macrophage in nature. ALP highlights one regenerating fiber (asterisk). There is diffuse HLA-ABC and HLA-DR expression. Faint equivocal C5b-9 capillary deposition is noted.

**Note:** bar = 50 µm; P-MM, possible myositis mimics; FSHD, facioscapulohumeral muscular dystrophy; H&E, hematoxylin and eosin; ACP, acid phosphatase; ALP, alkaline phosphatase; HLA-ABC, human leukocyte antigen-ABC, major histocompatibility complex class I; HLA-DR, human leukocyte antigen-DR, major histocompatibility complex class II; C5b-9, membrane attack complex.

Supplementary eFigure 4

Expression levels of genes in IFN-signaling pathway in different subtypes of idiopathic inflammatory myopathy.

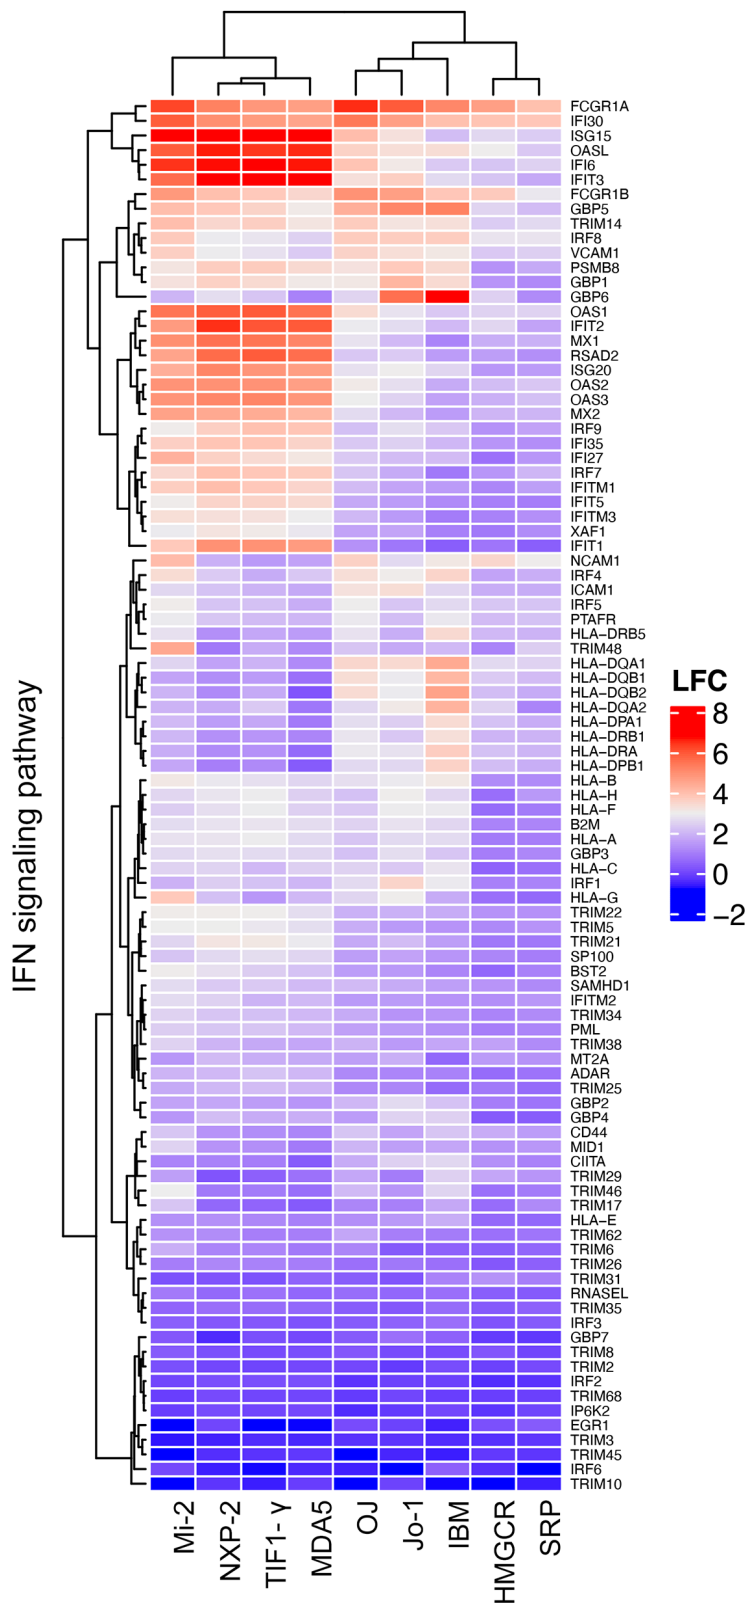

**Note:** IFN, interferon; Mi-2, anti-nucleosome remodeling-deacetylase (NuRD) complex; NXP-2, anti-nuclear complex protein 2; TIF1- $\gamma$ , anti-transcription intermediary factor 1-gamma; MDA5, anti-melanoma differentiation-associated gene 5; OJ, anti-OJ; Jo-1, anti-Jo-1; IBM, inclusion body myositis; HMGCR, anti-3-hydroxy-3-methylglutaryl coenzyme A reductase; SRP, anti-signal recognition particle

Supplementary eFigure 5

CIITA and HLA-DR expression

Normal

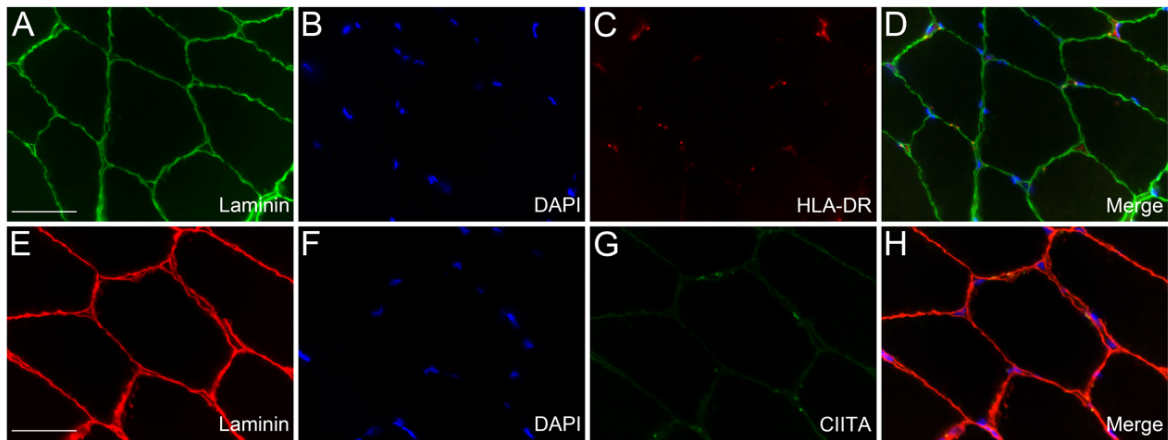

Anti-Jo1 ASS

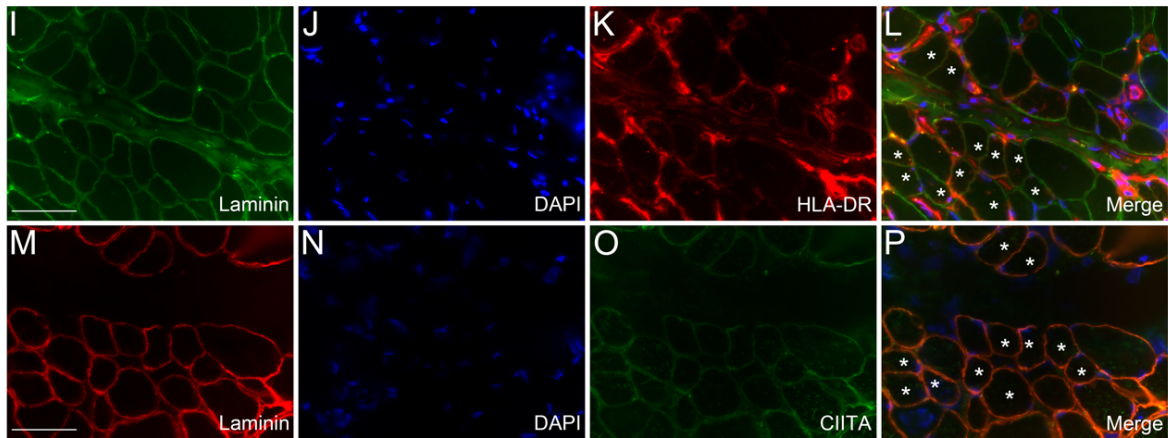

Normal muscle biopsy (**A-H**): Staining for HLA-DR and CIITA are negative in normal muscle biopsy. Serialized section of anti-Jo-1 ASS (**I-P**): Some fibers show HLA-DR (**K**) and CIITA expression (**O**); co-expression is focally observed (asterisks, **L** and **P**).

**Note:** bar = 50 $\mu$ m; DAPI, 4'6-diamidino-2-phenylindole; HLA-DR, human leukocyte antigen-DR, major histocompatibility complex class II; CIITA, major histocompatibility complex class II activator.
